# Supplementary material for: The choice of tree prior and molecular clock does not substantially affect phylogenetic inferences of diversification rates
Source: PeerJ journal article supplement (doi:10.7717/peerj.6334), 2019-03-13

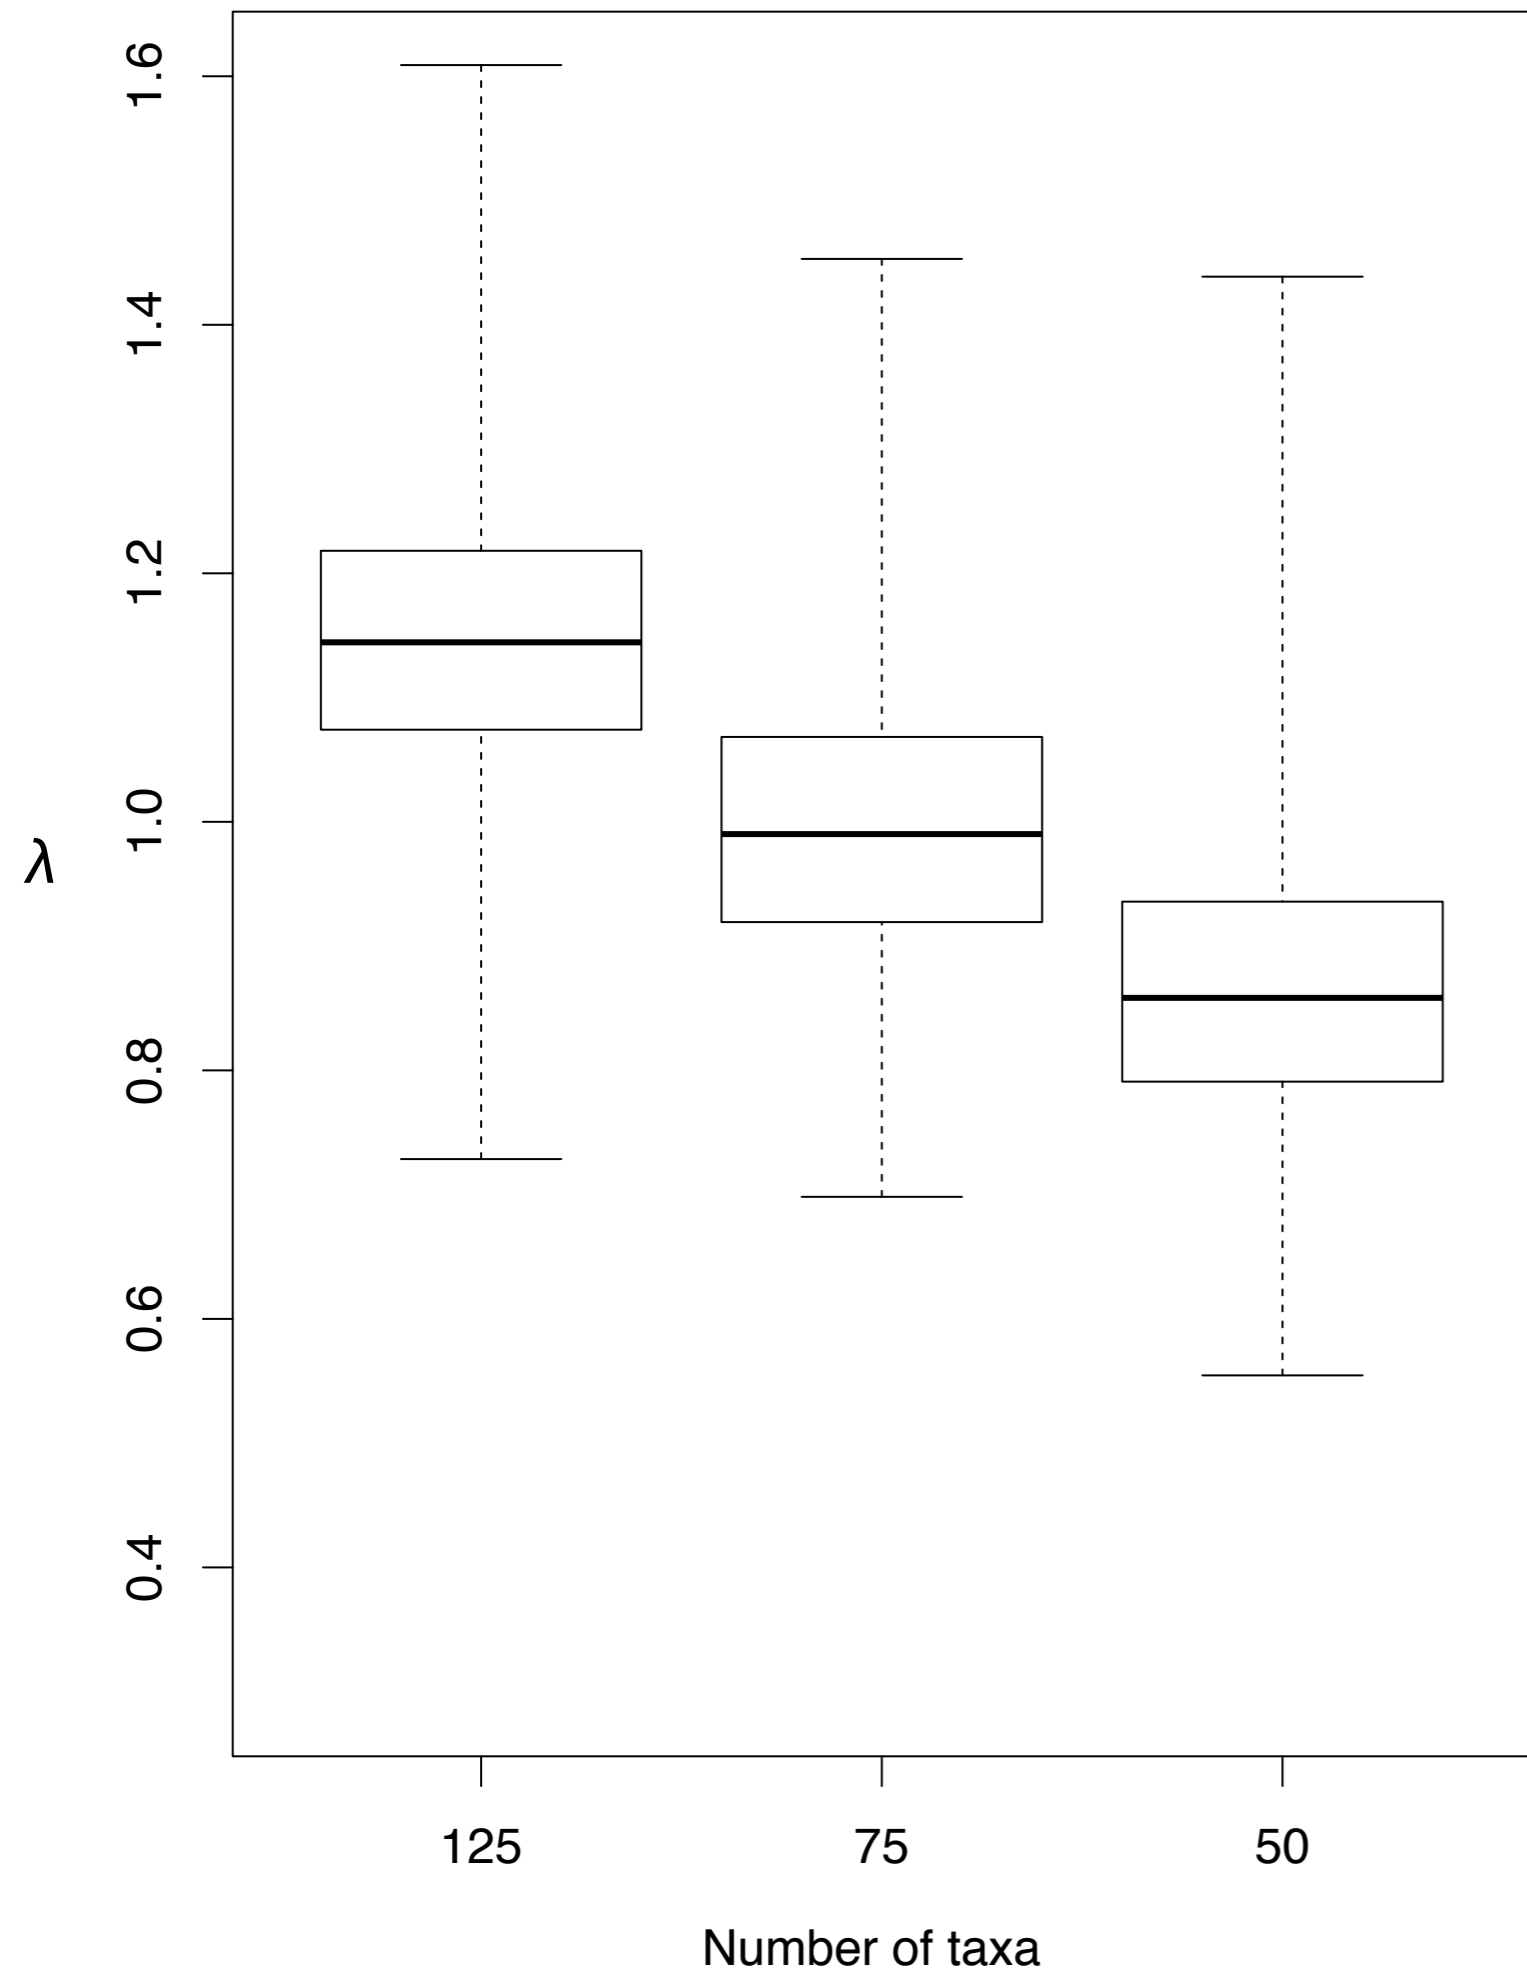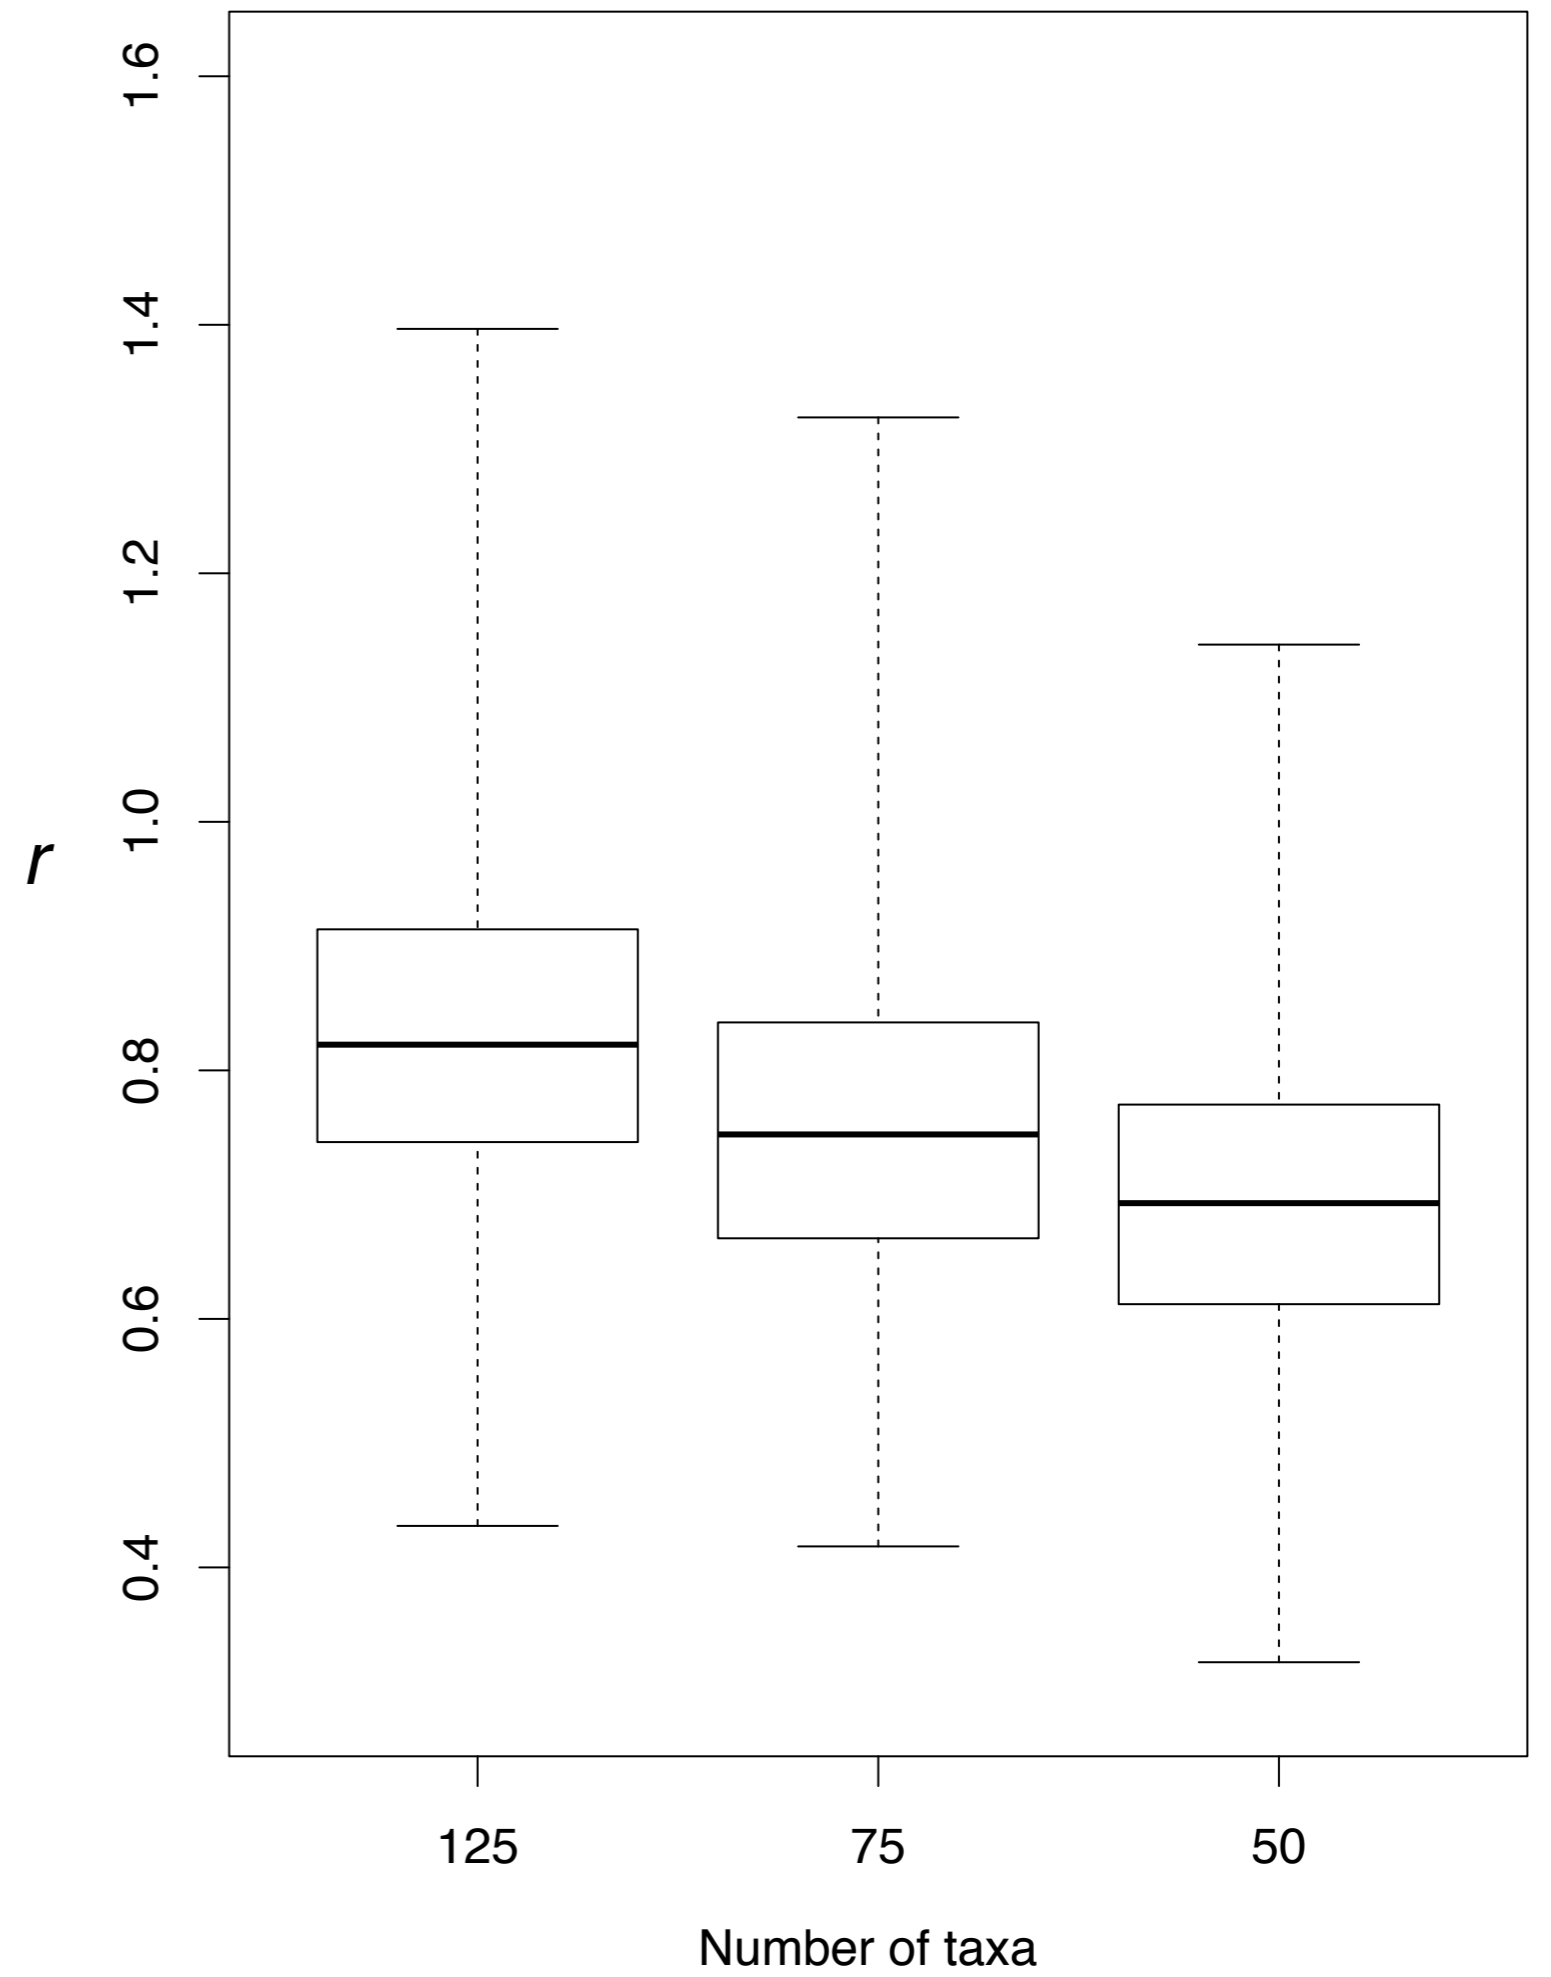

Supplement: Supplementary_Figure_S3.pdf [file Supplementary_Figure_S3.pdf]
